# Supplementary material for: Tailoring aromatic ring-terminated edges of g-C3N4nanosheets for efficient photocatalytic hydrogen evolution with simultaneous antibiotic removal
Source: Royal Society of Chemistry journal article supplement (doi:10.1039/d0cy00898b), 2020-01-01
Supplement: d0cy00898b1.pdf [file d0cy00898b1.pdf]

**Electronic Supplementary Information**

**Tailoring aromatic ring-terminated edges of g-C<sub>3</sub>N<sub>4</sub> nanosheets for efficient  
photocatalytic hydrogen evolution with simultaneous antibiotic wastewater  
removal**

Zhihong Chen, Shanshan Li, Yannan Peng, Chun Hu\*

Institute of Environmental Research at Greater Bay, Key Laboratory for Water Quality  
and Conservation of the Pearl River Delta, Ministry of Education, Guangzhou  
University, Guangzhou 510006, China.

\* Corresponding Author:

Phone: +86-20-39346609; fax: +86-10-62923541

E-mail: [huchun@rcees.ac.cn](mailto:huchun@rcees.ac.cn)

**Figure Caption:**

Figure S1 The corresponding EDS spectra of CNS (A) and ARCNS (B)

Figure S2 (A) The dual-functional photocatalytic activity of CNS and ARCNS without using Pt as co-catalyst; (B) TEM of ARCNS-3 recovered after dual-functional photocatalytic reaction tests.

Figure S3 Changes in the characteristic absorption of TC at different irradiation times in the present of ARCNS-3.

Figure S4 (A) The dual-functional photocatalytic activity and (B) UV-vis diffuse-reflectance spectrum and wavelength-dependent AQY of ARCNS-3 under different monochromatic light irradiation.

Figure S5 Total ion chromatograms of TC solution after 2 h dual-functional photocatalytic reaction in the present of ARCNS-3

Figure S6 The BET surface area of the as-prepared samples.

Figure S7 The EPR spectra of CNS and ARCNS-3 in dark and light condition.

**Table Caption:**

Table S1 Identification of the intermediates with small molecular weight of TC by GC-MS.

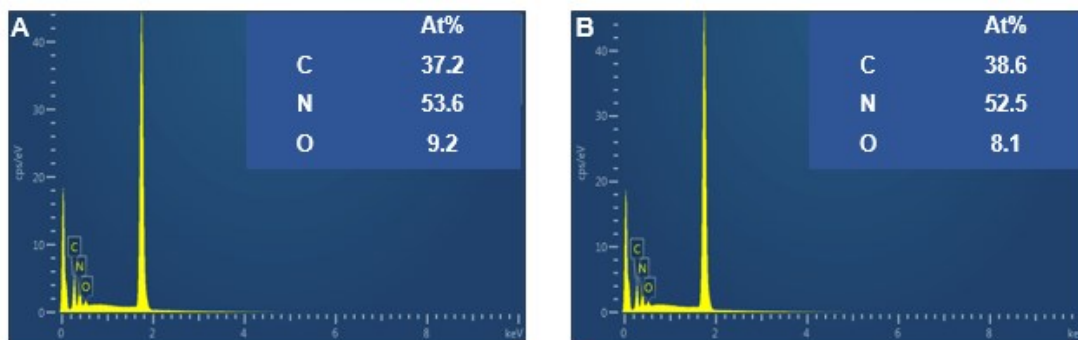

Figure S1 The corresponding EDS spectra of CNS (A) and ARCNS (B)

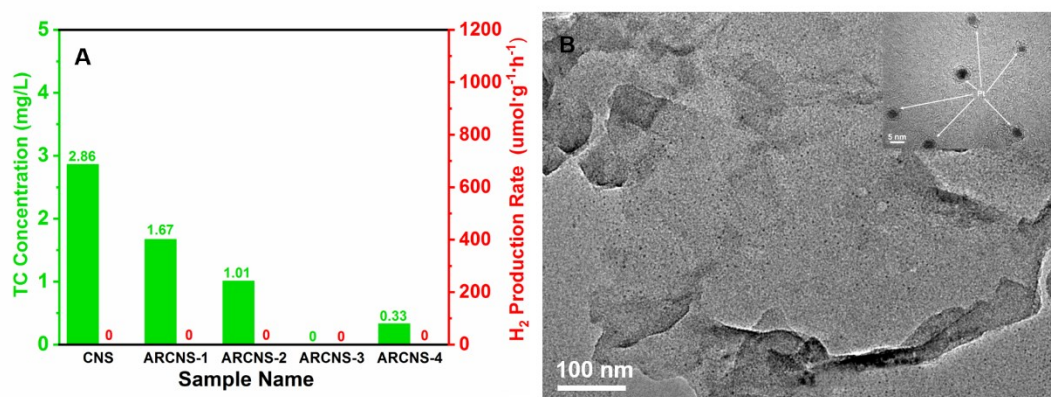

Figure S2 (A) The dual-functional photocatalytic activity of CNS and ARCNS without using Pt as co-catalyst; (B) TEM of ARCNS-3 recovered after dual-functional photocatalytic reaction tests.

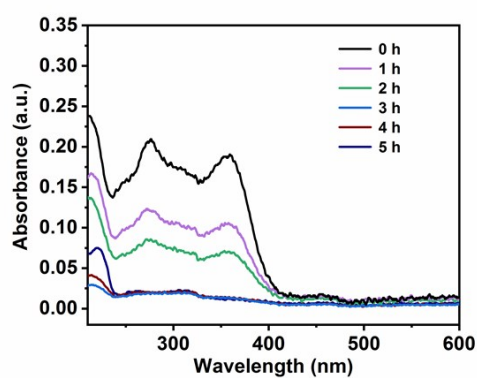

Figure S3 Changes in the characteristic absorption of TC at different irradiation times in the present of ARCNS-3.

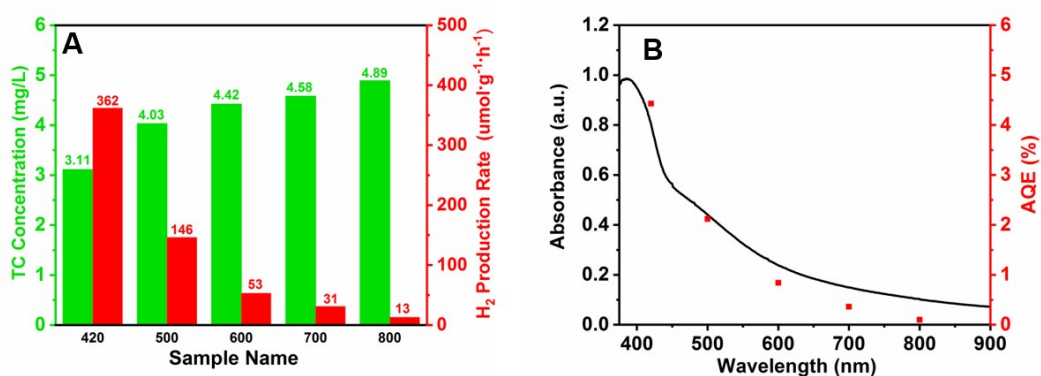

Figure S4 (A) The dual-functional photocatalytic activity and (B) UV-vis diffuse-reflectance spectrum and wavelength-dependent AQY of ARCNS-3 under under different monochromatic light irradiation.

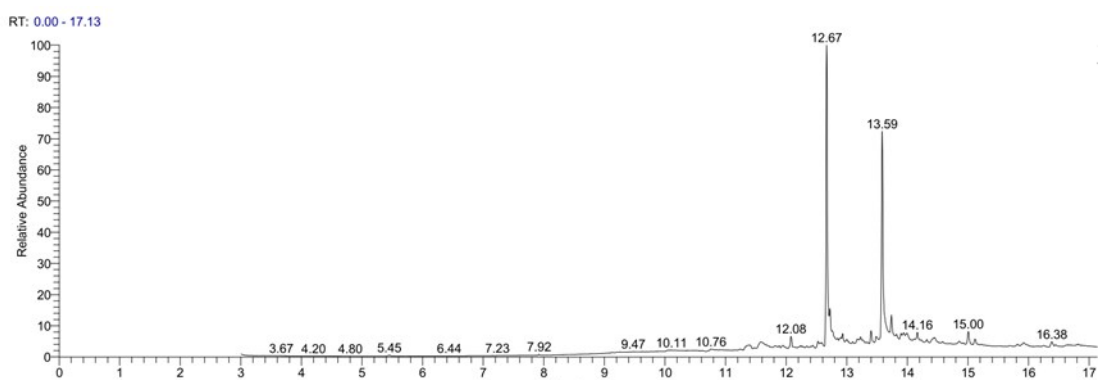

Figure S5 Total ion chromatograms of TC solution after 2 h dual-functional photocatalytic reaction in the presence of ARCNS-3

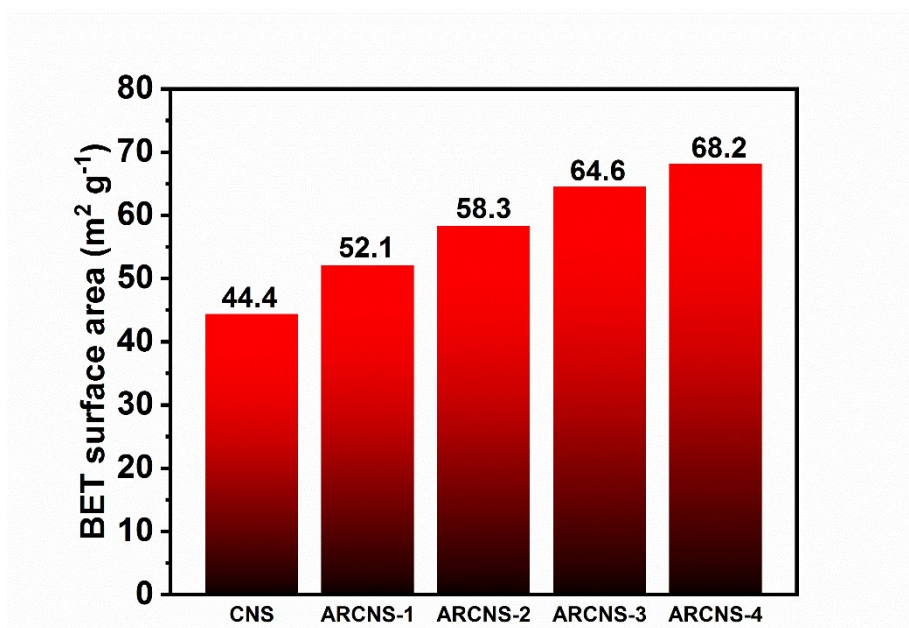

Figure S6 The BET surface area of the as-prepared samples.

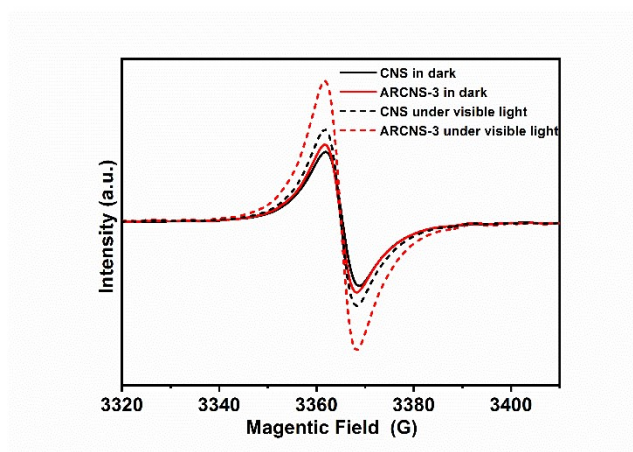

Figure S7 The EPR spectra of CNS and ARCNS-3 in dark and light condition.

Table S1 Identification of the intermediates with small molecular weight of TC by GC-MS.

| Radical Intermediate | Retention Time/min | m/z | Possible Molecular Structure                                                          |
|----------------------|--------------------|-----|---------------------------------------------------------------------------------------|
| 1                    | 5.45               | 133 | 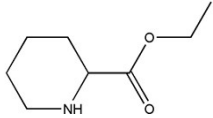   |
| 2                    | 7.92               | 146 |    |
| 3                    | 10.76              | 222 |    |
| 4                    | 12.08              | 98  |    |
| 5                    | 12.67              | 118 |   |
| 6                    | 13.59              | 116 |  |
| 7                    | 14.16              | 90  |  |
| 8                    | 15.00              | 207 |  |
| 9                    | 16.38              | 210 |  |
